# Supplementary material for: Candida albicans cell surface superoxide dismutases degrade host-derived reactive oxygen species to escape innate immune surveillance
Source: PubMed Central journal article supplement (PMC2713856; doi:10.1111/j.1365-2958.2008.06528.x), 2009-01
Supplement: mmi0071-0240-SD1.pdf [file mmi0071-0240-SD1.pdf]

**Table S1: Oligonucleotide primers used in this study**

| <b>Primers to generate deletion cassettes – direction 5' → 3'</b>                     |                                                       |
|---------------------------------------------------------------------------------------|-------------------------------------------------------|
| M5                                                                                    | ccgctgctaggcgcgccgtgACCAGTGTGATGGATATCTGC             |
| M3                                                                                    | gcagggatgcggccgctgacAGCTCGGATCCACTAGTAACG             |
| 55_caSOD1s                                                                            | CAAGTCCATCTAAAATGTGTTTG                               |
| 53_caSOD1as                                                                           | cacggcgcgcctagcagcggCATTTTTAATTATATATATGTTGATAATTGAAT |
| 35_caSOD1s                                                                            | gtcagcggccgcacccctgcTGAATAGATGAGCCAAGATTGC            |
| 33_caSOD1as                                                                           | ATGTGGGCATTATATTTGAACC                                |
| 55_caSOD2s                                                                            | gtgtgatttctcacaccaatc                                 |
| 53_caSOD2as                                                                           | cacggcgcgcctagcagcggCATTGTTAATTATAGTACAATTGTCTTTAAT   |
| 35_caSOD2s                                                                            | gtcagcggccgcacccctgcTAAGTTACTGGACAAAAGTCAAGTACA       |
| 33_caSOD2as                                                                           | GAGTTCTAAACAATGGTACTTATCCTAC                          |
| 55_caSOD3s                                                                            | AGGGAAACTTACCATGAATGTG                                |
| 53_caSOD3as                                                                           | cacggcgcgcctagcagcggCATGGCGTGGTTGATAAGAG              |
| 35_caSOD3s                                                                            | gtcagcggccgcacccctgcGATACTCTGCGTAACATTGTGTGTA         |
| 33_caSOD3as                                                                           | CCAATTAACCCTTCGGTAGTG                                 |
| 55_caSOD4s                                                                            | CAGCATAAACCAATAACATTACTC                              |
| 53_caSOD4as                                                                           | cacggcgcgcctagcagcggCATAGTAATAGTGTGTGTGATTAATAATC     |
| 35_caSOD4s                                                                            | gtcagcggccgcacccctgcTAGATAGAGAATAACTAGAACAAATCAAATG   |
| 33_caSOD4as                                                                           | CTTGAAAAAATATCATTAAAGTGAACG                           |
| 55_caSOD5s                                                                            | CACGGCTGAGAGGTCCTACTAC                                |
| 53_caSOD5as                                                                           | cacggcgcgcctagcagcggCATGATGAATGGTAAGTTAGATTG          |
| 35_caSOD5s                                                                            | gtcagcggccgcacccctgcAGATGAGCCATTTTACTTATTGTG          |
| 33_caSOD5as                                                                           | CATGTCTGTATAGGATAATGAAAGTG                            |
| 55_caSOD6s                                                                            | GCTTGGTAGTGGTGGACTAGAG                                |
| 53_caSOD6as                                                                           | cacggcgcgcctagcagcggCATCTTGCTGAGACGTTTAGTG            |
| 35_caSOD6s                                                                            | gtcagcggccgcacccctgcTAGTTGAACATAAATACTCTCACCC         |
| 33_caSOD6as                                                                           | CGATTGAGAGCTTGAGATTGAG                                |
| <b>Control primers for verifying genomic deletions – direction 5' → 3'</b>            |                                                       |
| 5_SOD1s                                                                               | CATTCAAAGACAGGTTGAATACAAC                             |
| 3_SOD1as                                                                              | CAACAAAGTGATATTAATCGAATGAC                            |
| 5_SOD2s                                                                               | CCAAATAGACATAAATTCGGTTC                               |
| 3_SOD2as                                                                              | TCAATCATAATGTTTATAGGACTGG                             |
| 5_SOD3s                                                                               | ATCTACTGGTATGAAGATTTGGTTAG                            |
| 3_SOD3as                                                                              | CAAAGCTCCAATCAATCCAAG                                 |
| 5_SOD4s                                                                               | AACCTCCTAAACGCAACTGC                                  |
| 3_SOD4as                                                                              | GAACCAAGGAAGCATTGCC                                   |
| 5_SOD5s                                                                               | CGGCAATTGATTACGACAAG                                  |
| 3_SOD5as                                                                              | CTCACGTTTGCTTCTCGC                                    |
| 5_SOD6s                                                                               | GAGGCATCTGTTGCTTCCAC                                  |
| 3_SOD6as                                                                              | CGGTAGACTATTTGTCATTGGTG                               |
| Leu2as                                                                                | GGAAACATTCACACAACCTGGG                                |
| Leu1s                                                                                 | ccggttacttgatcttcgg                                   |
| His2as                                                                                | CCCATACTCCTCACACAACAATCC                              |
| His1s                                                                                 | gccatgagcaccataaggacg                                 |
| <b>Primers to generate deletion cassettes with pSF2a SAT1-FLP – direction 5' → 3'</b> |                                                       |
| 55_SacI_SOD4s                                                                         | GAgagctcCAGCATAAACCAATAACATTACTC                      |
| 53_SOD4_NotIas                                                                        | GAgcggccgcCATAGTAATAGTGTGTGTGATTAATAATC               |

|                                                                                         |                                         |
|-----------------------------------------------------------------------------------------|-----------------------------------------|
| 35_Apal_SOD4s                                                                           | GAgggcccTAGATAGAGAATAACTAGAACAAATCAAATG |
| 33_SOD4_KpnIas                                                                          | GAggtaccCTTGAAAAAATATCATTAAAGTGAACG     |
| 55_SacI_SOD5s                                                                           | GAgagctcCACGGCTGAGAGGTCACTAC            |
| 53_SOD5_NotIas                                                                          | GAgcggccgcCATGATGAATGGTAAGTTAGATTG      |
| 35_Apal_SOD5s                                                                           | GAgggcccAGATGAGCCATTTTACTTATTGTG        |
| 33_SOD5_KpnIas                                                                          | GAggtaccCATGTCTGTATAGGATAATGAAAGTG      |
| 55_SacI_SOD6s                                                                           | GAgagctcGCTTGGTAGTGGTGGACTAGAG          |
| 53_SOD6_NotIas                                                                          | GAgcggccgcCATCTTGCTGAGACGTTTAGTG        |
| 35_Apal_SOD6s                                                                           | GAgggcccTAGTTGAACATAAATACTCTCACCC       |
| 33_SOD6_KpnIas                                                                          | GAggtaccCGATTGAGAGCTTGAGATTGAG          |
| SAT108as                                                                                | CTCCATCACCCAGTTTAGTTGTACC               |
| SAT101s                                                                                 | CTCAAGTCTCGAACGAAACAG                   |
| <b>Primers for genomic reintegration cassettes at original loci – direction 5' → 3'</b> |                                         |
| 33_SOD5_PvuIas                                                                          | GAcgatcgCATGTCTGTATAGGATAATGAAAGTG      |
| SOD5_ct_Notas                                                                           | GAgcggccgcATTTTATTTTCTTTTTTAAATCAAGGC   |
| <b>Primers for amplifying probes for Northern analysis – direction 5' → 3'</b>          |                                         |
| Sod5_49s                                                                                | GATGCACCAATCTCAACTG                     |
| Sod5_676as                                                                              | CAGCAATGACACCAACTAC                     |
| Sod4_9s                                                                                 | CTTGTCTATTATTTCAATTGTTGC                |
| Sod4_699as                                                                              | CTAAATTAAGCAGCAACAACAC                  |
| ACT1_s                                                                                  | ATGGACGGTGGTATGTTTTAGT                  |
| ACT1_as                                                                                 | CAGAAGATTGAGAAGAAGTTTGC                 |

**Table S2: Plasmids used in this study**

| <b>Plasmids</b> | <b>Relevant inserts and cloning sites</b>                                  | <b>References</b>     |
|-----------------|----------------------------------------------------------------------------|-----------------------|
| pSFS2a-SAT1-FLP |                                                                            | Reuss et al, 2004     |
| pSN40           |                                                                            | Noble & Johnson, 2005 |
| pSN51           |                                                                            | Noble & Johnson, 2005 |
| pSFS2a-SOD4     | <i>SacI</i> 5'SOD4 <i>NotI</i> -SAT1-FLP- <i>ApaI</i> 3'SOD4 <i>KpnI</i>   | This study            |
| pSFS2a-SOD5     | <i>SacI</i> 5'SOD5 <i>NotI</i> -SAT1-FLP- <i>ApaI</i> 3'SOD5 <i>KpnI</i>   | This study            |
| pSFS2a-SOD6     | <i>SacI</i> 5'SOD6ct <i>NotI</i> -SAT1-FLP- <i>ApaI</i> 3'SOD6 <i>KpnI</i> | This study            |
| pSFS2a-SOD5rev  | <i>SacI</i> 5'SOD5ct <i>NotI</i> -SAT1-FLP- <i>ApaI</i> 3'SOD5 <i>PvuI</i> | This study            |

**Table S3: Fungal strains used in this study**

| Strains  | Short Names                                        | Genotypes                                                                                                  | References            |
|----------|----------------------------------------------------|------------------------------------------------------------------------------------------------------------|-----------------------|
| SC5314   |                                                    |                                                                                                            | Gillum, et al, 1984   |
| SN152    | <i>arg4Δ/Δ</i><br><i>leu2Δ/Δ his1Δ/Δ</i>           | <i>arg4Δ/arg4Δ, leu2Δ/leu2Δ, his1Δ/his1Δ,</i><br><i>URA3/ura3Δ</i>                                         | Noble & Johnson, 2005 |
| CA-IF100 | <i>arg4Δ/Δ LEU2</i><br><i>HIS1</i>                 | <i>arg4Δ/arg4Δ, leu2Δ/leu2Δ::cmLEU2,</i><br><i>his1Δ/his1Δ::cdHIS1, URA3/ura3Δ,</i>                        | This study            |
| CA-IF001 | <i>sod1Δ</i>                                       | SN152, <i>sod1Δ::cmLEU2/SOD1</i>                                                                           | This study            |
| CA-IF003 | <i>sod1Δ/Δ</i>                                     | SN152, <i>sod1Δ::cmLEU2/sod1Δ::CdHIS1</i>                                                                  | This study            |
| CA-IF005 | <i>sod2Δ</i>                                       | SN152, <i>sod2Δ::cmLEU2/SOD1</i>                                                                           | This study            |
| CA-IF007 | <i>sod2Δ/Δ</i>                                     | SN152, <i>sod2Δ::cmLEU2/sod2Δ::CdHIS1</i>                                                                  | This study            |
| CA-IF009 | <i>sod3Δ</i>                                       | SN152, <i>sod3Δ::cmLEU2/SOD2</i>                                                                           | This study            |
| CA-IF011 | <i>sod3Δ/Δ</i>                                     | SN152, <i>sod3Δ::cmLEU2/sod3Δ::CdHIS1</i>                                                                  | This study            |
| CA-IF013 | <i>sod4Δ</i>                                       | SN152, <i>sod4Δ::cmLEU2/SOD4</i>                                                                           | This study            |
| CA-IF015 | <i>sod4Δ/Δ</i>                                     | SN152, <i>sod4Δ::cmLEU2/sod4Δ::CdHIS1</i>                                                                  | This study            |
| CA-IF017 | <i>sod5Δ</i>                                       | SN152, <i>sod5Δ::cmLEU2/SOD5</i>                                                                           | This study            |
| CA-IF019 | <i>sod5Δ/Δ</i>                                     | SN152, <i>sod5Δ::cmLEU2/sod5Δ::CdHIS1</i>                                                                  | This study            |
| CA-IF025 | <i>sod5Δ/SOD5</i>                                  | SN152,<br><i>sod5Δ::cmLEU1/sod5Δ::CdHIS1::SOD5-SAT1-</i><br><i>FLP</i>                                     | This study            |
| CA-IF027 | <i>sod5Δ/SOD5</i>                                  | SN152,<br><i>sod5Δ::cmLEU1/sod5Δ::CdHIS1::SOD5-FRT</i>                                                     | This study            |
| CA-IF030 | <i>sod5Δ/Δ sod4Δ</i>                               | SN152, <i>sod5Δ::cmLEU1/sod5Δ::CdHIS1</i><br><i>sod4Δ::SAT1-FLP/SOD4</i>                                   | This study            |
| CA-IF033 | <i>sod5Δ/Δ sod4Δ</i>                               | SN152, <i>sod5Δ::cmLEU1/sod5Δ::CdHIS1</i><br><i>sod4Δ::FRT/SOD4</i>                                        | This study            |
| CA-IF036 | <i>sod5Δ/Δ</i><br><i>sod4Δ/Δ</i>                   | SN152, <i>sod5Δ::cmLEU1/sod5Δ::CdHIS1</i><br><i>sod4Δ::FRT/sod4Δ::SAT1-FLP</i>                             | This study            |
| CA-IF039 | <i>sod4/5Δ/Δ</i>                                   | SN152, <i>sod5Δ::cmLEU1/sod5Δ::Cd HIS1</i><br><i>sod4Δ::FRT/sod4Δ::FRT</i>                                 | This study            |
| CA-IF021 | <i>sod6Δ</i>                                       | SN152, <i>sod6Δ::cmLEU2/SOD6</i>                                                                           | This study            |
| CA-IF023 | <i>sod6Δ/Δ</i>                                     | SN152, <i>sod6Δ::cmLEU1/sod6Δ::CdHIS1</i>                                                                  | This study            |
| CA-IF043 | <i>sod6Δ/Δ sod4Δ</i>                               | SN152, <i>sod6Δ::cmLEU1/sod6Δ::CdHIS1</i><br><i>sod4Δ::SAT1-FLP/SOD4</i>                                   | This study            |
| CA-IF046 | <i>sod6Δ/Δ sod4Δ</i>                               | SN152, <i>sod6Δ::cmLEU1/sod6Δ::CdHIS1</i><br><i>sod4Δ::FRT/SOD4</i>                                        | This study            |
| CA-IF049 | <i>sod6Δ/Δ</i><br><i>sod4Δ/Δ</i>                   | SN152, <i>sod6Δ::cmLEU1/sod6Δ::CdHIS1</i><br><i>sod4Δ::FRT/sod4Δ::SAT1-FLP</i>                             | This study            |
| CA-IF051 | <i>sod4/6Δ/Δ</i>                                   | SN152, <i>sod6Δ::cmLEU1/sod6Δ::CdHIS1</i><br><i>sod4Δ::FRT/sod4Δ::FRT</i>                                  | This study            |
| CA-IF054 | <i>sod5Δ</i>                                       | SC5314, <i>sod5Δ::SAT1-FLP/SOD5</i>                                                                        | This study            |
| CA-IF057 | <i>sod5Δ</i>                                       | SC5314, <i>sod5Δ::FRT/SOD5</i>                                                                             | This study            |
| CA-IF060 | <i>sod5Δ/Δ</i>                                     | SC5314, <i>sod5Δ::FRT/ sod5Δ::SAT1-FLP</i>                                                                 | This study            |
| CA-IF063 | <i>sod5Δ/Δ</i>                                     | SC5314, <i>sod5Δ::FRT/sod5Δ::FRT</i>                                                                       | This study            |
| CA-IF067 | <i>sod5Δ/Δ</i><br><i>sod4Δ/Δ sod6Δ</i>             | SN152, <i>sod5Δ::cmLEU1/sod5Δ::Cd HIS1</i><br><i>sod4Δ::FRT/sod4Δ::FRT sod6Δ::FRT/SOD6</i>                 | This study            |
| CA-IF070 | <i>sod5Δ/Δ</i><br><i>sod4Δ/Δ</i><br><i>sod6Δ/Δ</i> | SN152, <i>sod5Δ::cmLEU1/sod5Δ::Cd HIS1</i><br><i>sod4Δ::FRT/sod4Δ::FRT</i><br><i>sod6Δ::FRT/sod6Δ::FRT</i> | This study            |
